# Supplementary material for: Coronary computed tomography angiography as a screening tool for moderate-high risk asymptomatic type 2 diabetes mellitus patients
Source: Research Square preprint supplement (doi:10.21203/rs.3.rs-1732761/v1), 2022-06-14
Supplement: Supplementary file 1 [file 0018aabd3fa1a4b06030477b.xlsx]

## Sheet: Sheet1
Table 3 Comparisons of the clinical and biochemical characteristics among the DM subgroups.
Characteristics	Low-risk group	Moderate-risk group	High-risk group	p value (p<0.05)
N	40	48	53	-
†Male gender	19 (48%)	26 (54%)	35 (66%)	χ2=3.387 p=0.184a
‡Age (years)	51±5	58±6	63±8	H=50.548 p<0.001b*
†Current smoker	8 (20%)	18 (38%)	16 (30%)	χ2=3.201 p=0.202a
‡Duration of diabetes (years)	1 (6, 9)	3 (10, 13)	15 (7, 20)	H=20.548 p<0.001b*
‡SBP (mmHg)	128±16	134±17	143±17	H=15.734 p<0.001b*
§Triglycerides (mmol/l)	1.2 (0.9, 1.7)	1.5 (0.9, 2.1)	1.6 (1.2, 2.2)	H=4.552 p=0.103b
‡Total cholesterol(mmol/l)	4.0±1.0	4.7±1.1	4.7±1.1	H=11.145 p=0.004b*
‡HDL cholesterol(mmol/l)	1.1±0.2	1.2±0.3	1.1±0.2	H=3.009 p=0.222b
§FBG (mmol/l)	6.6 (5.3, 8.3)	7.3 (6.4, 8.6)	7.4 (6.1, 9.7)	H=6.985 p=0.030b*
§HbA1c (%)	8.1±1.8	9.1±2.2	9.6±2.0	H=13.749 p=0.001b*
†Data are expressed as n (%); ‡ Data are expressed as the mean ± standard deviation; §Data are expressed as the median (interquartile range); a p value by χ2 test; b p value by Kruskal Wallis test; * p<0.05; SBP, systolic blood pressure; HDL, high-density lipoprotein; FBG, fasting blood glucose.
