# Supplementary material for: Coronary computed tomography angiography as a screening tool for moderate-high risk asymptomatic type 2 diabetes mellitus patients
Source: Research Square preprint supplement (doi:10.21203/rs.3.rs-1732761/v1), 2022-06-14
Supplement: Supplementary file 2 [file 6b6d18353d5cff672f072b44.xlsx]

## Sheet: Sheet1
Table 6 Binary logistic regression analysis of the CCTA findings.
CCTA findings	Control group	DM group			Low-risk group		Moderate-risk group		High-risk group
		OR (95% CI)	p value		OR (95% CI)	p value	OR (95% CI)	p value	OR (95% CI)	p-value
	Reference
SIS > 3		4.756 (2.650-8.534)	<0.001*		2.385 (1.084-5.248)	0.031*	7.838 (3.575-17.182)	<0.001*	5.325 (2.559-11.082)	<0.001*
SSS > 5		4.717 (2.359-9.431)	<0.001*		1.960 (0.752-5.109)	0.169	6.750 (2.946-15.468)	<0.001*	6.027 (2.677-13.567)	<0.001*
OS		5.408 (2.803-10.435)	<0.001*		2.717 (1.136-6.500)	0.025*	7.900 (3.523-17.717)	<0.001*	6.320 (2.887-13.835)	<0.001*
a p value by χ2 test; b p value by Kruskal Wallis test with Bonferroni correction for the post hoc test; * p value <0.05; OR, odds ratio; CI, confidence interval; SIS, segment involvement score; SSS, segment stenosis score; OS, obstructive stenosis.
