# Supplementary material for: Coronary computed tomography angiography as a screening tool for moderate-high risk asymptomatic type 2 diabetes mellitus patients
Source: Research Square preprint supplement (doi:10.21203/rs.3.rs-1732761/v1), 2022-06-14
Supplement: Supplementary file 4 [file df357fac63b02a02d7464ce7.xlsx]

## Sheet: Sheet1
Table 4 Comparisons of the coronary stenosis scores among the CHD risk subgroups and the control group.
Coronary stenosis scores	control group	DM group			p value
		Low-risk group	moderate-risk group	high-risk group	(p<0.05)
N	93	40	48	53	-
†SPP positive	0 (0%)	1 (3%)	8 (17%)	11 (21%)	χ2=24.716 p<0.001a*
‡SIS	2.0 (0.0, 3.0)	3.0 (1.3, 4.0)	5.0 (3.0, 7.0)	4.0 (2.5, 7.0)	H=41.079 p<0.001b*
‡SSS	2.0 (0.0, 4.0)	3.5 (1.3, 5.0)	5.5 (3.0, 10.0)	5.0 (3.0, 12.5)	H=45.246 p<0.001b*
‡SC	1.0 (0.0, 1.0)	1.0 (1.0, 1.3)	1.2 (1.0, 1.6)	1.3 (1.0, 1.7)	H=43.567 p<0.001b*
†Data are expressed as n (%); ‡ Data are expressed as the median (interquartile range); a p value by χ2 test; b p value by Kruskal Wallis test; * p<0.05; SPP, severe proximal plaque; SIS, segment involvement score; SSS, segment stenosis score; SC, stenosis coefficient.
