# Supplementary material for: Coronary computed tomography angiography as a screening tool for moderate-high risk asymptomatic type 2 diabetes mellitus patients
Source: Research Square preprint supplement (doi:10.21203/rs.3.rs-1732761/v1), 2022-06-14
Supplement: Supplementary file 5 [file cbe4e95410f32bf0b2b4c575.xlsx]

## Sheet: Sheet1
Table 5 Post hoc multiple comparisons among the CHD risk subgroups and the control group.
Coronary stenosis scores	p value (p<0.05)
	Group 1-2	Group 1-3	Group 1-4	Group 2-3	Group 2-4	Group 3-4
SPP a	0.663	<0.001*	<0.001*	0.067	0.022*	0.787
SIS b	0.147	<0.001*	<0.001*	0.102	0.133	1
SSS b	0.116	<0.001*	<0.001*	0.086	0.076	1
SC b	0.132	<0.001*	<0.001*	0.166	0.052	1
a p value by χ2 test; b p value by Kruskal Wallis test with Bonferroni correction for the post hoc test; * p value <0.05; Group 1, control group; Group 2, low CHD risk group; Group 3, moderate CHD risk group; Group 4, high CHD risk group; SPP, severe proximal plaque; SIS, segment involvement score; SSS, segment stenosis score; SC, stenosis coefficient.
